# Supplementary material for: Codonopsis pilosula oligosaccharides modulate the gut microbiota and change serum metabolomic profiles in high-fat diet-induced obese mice
Source: Royal Society of Chemistry journal article supplement (doi:10.1039/d2fo01119k), 2022-01-01
Supplement: d2fo01119k1.pdf [file d2fo01119k1.pdf]

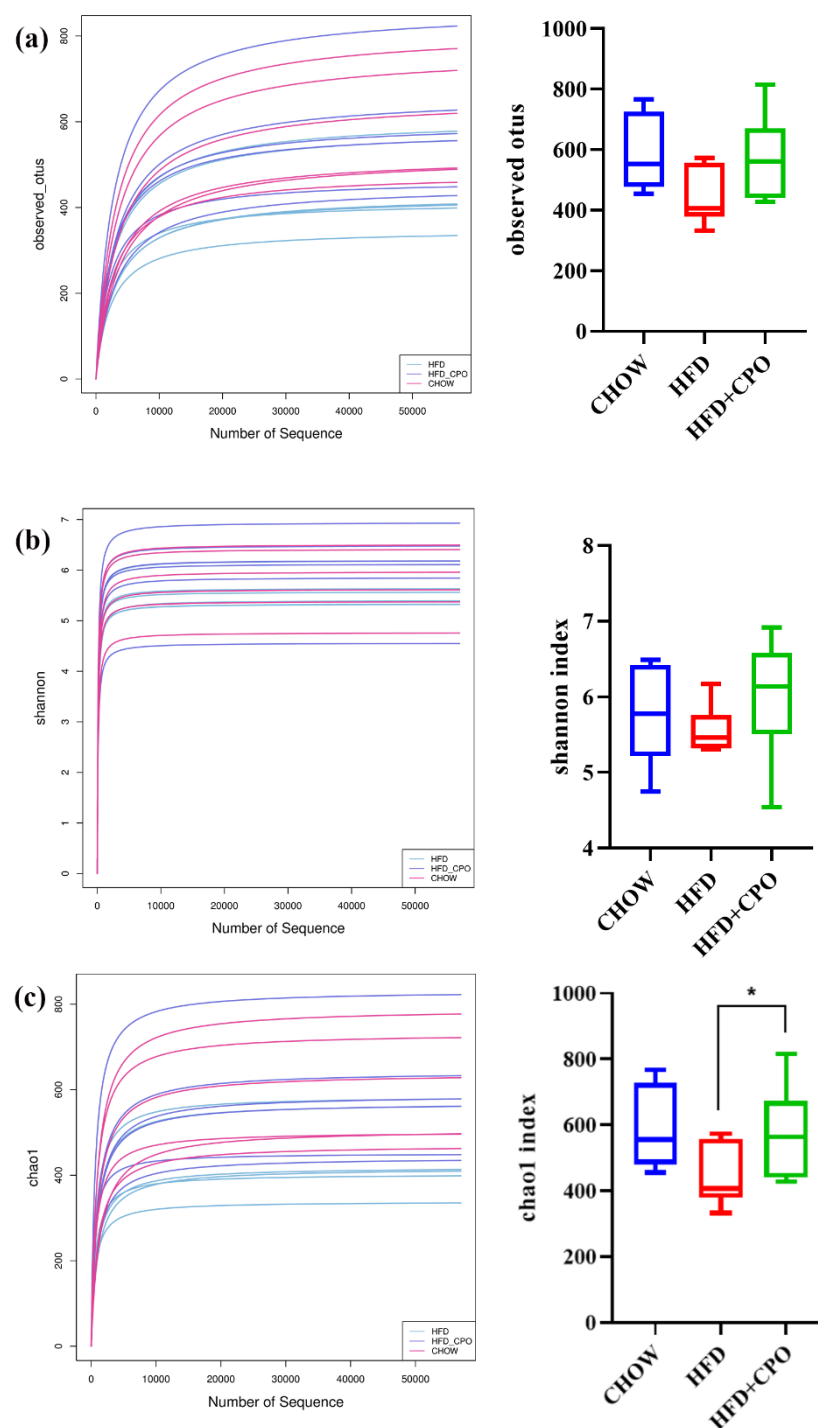

**Figure S1.** Diversity analysis of CPO-treated gut microbiota. Observed otus (a), Chao-1 index (b) and Shannon index (c) of fecal samples from mice fed with CHOW (n=6), HFD (n=6), HFD+CPO (n =6). Data are expressed as means  $\pm$  SD. Significance was determined by Student's t- test. \* $P < 0.05$ , for CHOW vs HFD.

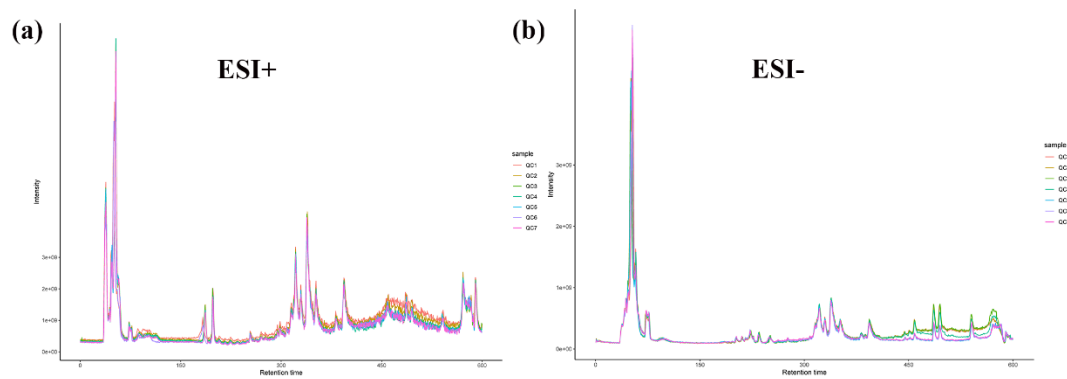

**Figure S2.** TIC of QC sample. (a) Positive modes; (b) Negative modes.
