# Supplementary material for: Codonopsis pilosula oligosaccharides modulate the gut microbiota and change serum metabolomic profiles in high-fat diet-induced obese mice
Source: Royal Society of Chemistry journal article supplement (doi:10.1039/d2fo01119k), 2022-01-01
Supplement: d2fo01119k2.pdf [file d2fo01119k2.pdf]

**Table S1.** qPCR primer sequences.

| Gene           | Sequence 5'- 3'                                        |
|----------------|--------------------------------------------------------|
| GAPDH          | FW: CCATCACCATCTTCCAGGAG<br>RV: CCTGCTTCACCACCTTCTTG   |
| TNF- $\alpha$  | FW: CACCACGCTCTTCTGTCTACT<br>RV: CCACTTGGTGGTTTGTGAGTG |
| IL-1 $\beta$   | FW: GTGTCTTCCCGTGGACCTT<br>RV: AATGGGAACGTCACACACCA    |
| IL-10          | FW: GCGCTGTCATCGATTTCTC<br>RV: ATGGCCTGTAGACACCTTGG    |
| MCP-1          | FW: CTGCATCTGCCCTAAGGTCT<br>RV: AGTGCTTGAGGTGGTTGTGG   |
| PAI-1          | FW: TGGAAGGGCAACATGACCAG<br>RV: TCAGGCATGCCCAACTTCTC   |
| IFN- $\gamma$  | FW: GCGTCATTGAATCACACCTGA<br>RV: CTGGACCTGTGGGTTGTTGA  |
| CD36           | FW: GAAGAAGGAACCACTGC<br>RV: CTACAGCCAGATTCAGAAC       |
| Fasn           | FW: TGGAGGAGGTGGTGATAG<br>RV: AGTGAGGCTGGGTTGATA       |
| PPAP- $\gamma$ | FW: CCACCAACTTCGGAATC<br>RV: GCTCTTGTGAATGGAATGTC      |

**Table S2.** The tissue weights and intestinal length of mice

|                        | <b>HFD</b>   | <b>HFD+CPO</b>           | <b>CHOW</b>               | <b>CHOW+CPO</b> |
|------------------------|--------------|--------------------------|---------------------------|-----------------|
| Intestinal length (cm) | 44.26 ± 2.01 | 43.85 ± 1.81             | 42.29 ± 3.26              | 42.59 ± 1.79    |
| Liver (g)              | 1.11 ± 0.13  | 1.01 ± 0.11 <sup>#</sup> | 1.00 ± 0.19 <sup>**</sup> | 1.01 ± 0.08     |
| Heart(g)               | 0.11 ± 0.01  | 0.11 ± 0.01              | 0.11 ± 0.01               | 0.11 ± 0.01     |
| Spleen(g)              | 0.06 ± 0.01  | 0.07 ± 0.02              | 0.06 ± 0.02               | 0.06 ± 0.01     |
| Kidney(g)              | 0.34 ± 0.02  | 0.33 ± 0.02              | 0.30 ± 0.04 <sup>*</sup>  | 0.30 ± 0.02     |
| Pancreas(g)            | 0.21 ± 0.04  | 0.17 ± 0.03              | 0.18 ± 0.04               | 0.17 ± 0.03     |

Values are means ± SD., n = 10. <sup>\*\*</sup>*P* < 0.01 for CHOW vs. HFD; <sup>#</sup>*P* < 0.05 for HFD+CPO vs. HFD.

**Table S3.** The sequencing reads statistics of samples in different groups.

| Samples  | Sequencing reads |
|----------|------------------|
| HFD1     | 73386            |
| HFD2     | 75241            |
| HFD3     | 79644            |
| HFD4     | 75501            |
| HFD5     | 76722            |
| HFD6     | 71467            |
| Mean     | 75327            |
| HFD+CPO1 | 75222            |
| HFD+CPO2 | 72680            |
| HFD+CPO3 | 78270            |
| HFD+CPO4 | 77946            |
| HFD+CPO5 | 71473            |
| HFD+CPO6 | 73230            |
| Mean     | 74804            |
| CHOW1    | 75207            |
| CHOW2    | 75760            |
| CHOW3    | 76709            |
| CHOW4    | 80116            |
| CHOW5    | 74061            |
| CHOW6    | 78414            |
| Mean     | 76711            |

**Table S4.** Potentiale biomarkers associated with CPO treatment in mouse plasma

|    | Metabolites         | KEGG ID | HMDB ID     | Formula   | tR/min | Mass(m/z) | FCs  | FCT  | HFD vs CHOW | HFD+CPO vs HFD | pathway |
|----|---------------------|---------|-------------|-----------|--------|-----------|------|------|-------------|----------------|---------|
| 1  | 2-methylhistamine   | C17928  | --          | C6H11N3   | 0.77   | 125.09    | 1.51 | 0.52 | Up          | Down           |         |
| 2  | 3-dehydrocarnitine  | C02636  | HMDB0012154 | C7H13NO3  | 0.79   | 159.09    | 0.62 | 1.69 | Down        | Up             |         |
| 3  | 4-methylphenol      | C01468  | HMDB0001858 | C7H8O     | 3.74   | 108.06    | 0.42 | 2.24 | Down        | Up             | a       |
| 4  | 8'-hydroxyabscisate | C15514  | --          | C15H20O5  | 4.17   | 280.13    | 1.72 | 0.56 | Up          | Down           | b       |
| 5  | albuterol           | C11770  | HMDB0001937 | C13H21NO3 | 4.46   | 239.15    | 3.54 | 0.50 | Up          | Down           |         |
| 6  | beta-ionone         | C12287  | HMDB0036565 | C13H20O   | 4.52   | 192.15    | 0.57 | 1.64 | Down        | Up             |         |
| 7  | boschnaloside       | C11652  | --          | C16H24O8  | 3.68   | 344.15    | 2.07 | 0.41 | Up          | Down           |         |
| 8  | capsi-amide         | C17515  | HMDB0040940 | C17H35NO  | 7.75   | 269.27    | 0.34 | 1.68 | Down        | Up             |         |
| 9  | cortisol            | C00735  | HMDB0000063 | C21H30O5  | 4.16   | 362.21    | 1.94 | 0.47 | Up          | Down           | c,d     |
| 10 | decylubiquinol      | C15495  | --          | C19H32O4  | 5.47   | 324.23    | 0.42 | 1.55 | Down        | Up             |         |

|    |                            |        |             |            |      |        |       |       |      |      |       |
|----|----------------------------|--------|-------------|------------|------|--------|-------|-------|------|------|-------|
| 11 | elaecanane c               | C10592 | --          | C12H21NO2  | 3.65 | 211.16 | 0.56  | 2.23  | Down | Up   |       |
| 12 | fusidic acid               | C06694 | HMDB0015570 | C31H48O6   | 5.87 | 516.34 | 1.58  | 0.54  | Up   | Down |       |
| 13 | isodomedin                 | C09115 | --          | C22H32O6   | 4.38 | 392.22 | 1.51  | 0.56  | Up   | Down |       |
| 14 | L-kynurenine               | C00328 | HMDB0000684 | C10H12N2O3 | 2.96 | 208.08 | 1.75  | 0.57  | Up   | Down | e     |
| 15 | oleamide                   | C19670 | HMDB0002117 | C18H35NO   | 7.62 | 281.27 | 1.61  | 0.65  | Up   | Down |       |
| 16 | palmitoyl ethanolamide     | C16512 | HMDB0002100 | C18H37NO2  | 5.06 | 299.28 | 13.58 | 0.12  | Up   | Down | f     |
| 17 | piperidine                 | C01746 | HMDB0034301 | C5H11N     | 1.90 | 85.09  | 0.65  | 1.61  | Down | Up   |       |
| 18 | pseudouridine              | C02067 | HMDB0000767 | C9H12N2O6  | 1.23 | 244.07 | 0.65  | 1.76  | Down | Up   | g     |
| 19 | sulcatone                  | C07287 | HMDB0035915 | C8H14O     | 3.52 | 126.10 | 2.27  | 0.67  | Up   | Down |       |
| 20 | taurochenodeoxycholic acid | C05465 | HMDB0000951 | C26H45NO6S | 4.60 | 516.32 | 0.11  | 12.22 | Down | Up   | h,i,j |

a: Protein digestion and absorption; b: Carotenoid biosynthesis; c: Bile secretion; d: Neuroactive ligand-receptor interaction; e: Tryptophan metabolism; f: Neuroactive ligand-receptor interaction; g: Pyrimidine metabolism; h: Primary bile acid biosynthesis; i: Secondary bile acid biosynthesis; j: Cholesterol metabolism
